# Supplementary material for: Reorienting rabies research and practice: Lessons from India
Source: PubMed Central journal article supplement (PMC7115975; doi:10.1057/s41599-019-0358-y), 2019-12-03
Supplement: EMS88747-supplement-Supplementary_tables_1_3.pdf [file EMS88747-supplement-Supplementary_tables_1_3.pdf]

### Author information

Krithika Srinivasan (Corresponding author)  
Institute of Geography  
University of Edinburgh  
[K.srinivasan@ed.ac.uk](mailto:K.srinivasan@ed.ac.uk)

Tim Kurz  
Department of Psychology  
University of Bath

Pradeep Kuttuva  
Independent Researcher

Chris Pearson  
Department of History  
University of Liverpool

**Supplementary Table 1:** Means and Standard Deviations of scores on each ATSD item

| ATSD item                                              | N   | Minimum | Maximum | Mean   | Standard Deviation |
|--------------------------------------------------------|-----|---------|---------|--------|--------------------|
| Dislike of street dogs                                 | 401 | 1.00    | 5.00    | 3.1646 | 1.26010            |
| Fear of street dogs                                    | 401 | 1.00    | 5.00    | 3.2594 | 1.29906            |
| Street dogs are a problem                              | 401 | 1.00    | 5.00    | 3.6434 | 1.02957            |
| Street dogs do not belong in Chennai                   | 401 | 1.00    | 5.00    | 2.7556 | 1.17479            |
| Street dogs are pests                                  | 401 | 1.00    | 5.00    | 3.6409 | .99786             |
| Street dogs do not have a right to live on the streets | 401 | 1.00    | 5.00    | 2.2868 | .91654             |
| Street dogs are a nuisance                             | 401 | 1.00    | 5.00    | 3.6035 | 1.02708            |
| Street dogs are not harmless/vulnerable                | 401 | 1.00    | 5.00    | 2.2219 | .92904             |

**Supplementary Table 2:** The percentage of the sample of survey participants who spontaneously mentioned each type of option in response to being asked what they thought might be the best thing to do if a dog chases you while you are riding a bicycle or motorbike.

| <b>Response</b>                                   | <b>% of sample<br/>who<br/>mentioned it</b> |
|---------------------------------------------------|---------------------------------------------|
| Avoid riding too fast                             | 42%                                         |
| Stop the bike                                     | 41%                                         |
| Avoid braking suddenly                            | 27%                                         |
| Carry and use stones and sticks                   | 24%                                         |
| Put up your legs and continue riding              | 19%                                         |
| Avoid neighbourhoods where there are chasing dogs | 20%                                         |
| Avoid making weird noises                         | 16%                                         |
| Become friendly with the dog(s)                   | 10%                                         |
| Offer food to the dog(s)                          | 9%                                          |
| Talk to the dog(s)                                | 5%                                          |
| Do not make eye contact                           | 4%                                          |
| I don't know                                      | 1.7%                                        |

**Supplementary Table 3:** The percentage of the sample of survey participants who spontaneously mentioned each type of action as being a good thing to do if bitten by a dog

| <b>Action</b>                                              | <b>% of sample<br/>who<br/>mentioned it</b> |
|------------------------------------------------------------|---------------------------------------------|
| Go to the doctor/hospital                                  | 81%                                         |
| Wash it with soap and water                                | 47%                                         |
| Observe the dog                                            | 28%                                         |
| Find out if the dog has been vaccinated                    | 9%                                          |
| Seek Ayurvedic treatment                                   | 6%                                          |
| Apply some form of herb or spice                           | 4%                                          |
| Magico-religious treatment (faith healing, witchcraft etc) | 3%                                          |
| Apply chunaambu (slaked lime)                              | 2%                                          |
| Apply kerosense                                            | 1%                                          |
| Do nothing                                                 | 1%                                          |
